# Supplementary material
Source: HighWire-hosted journal article supplement (https://gut.bmj.com/content/67/9/1626)
Supplement: inline-supplementary-material-1 [file inline-supplementary-material-1.pdf]

## Appendices

Appendix Figure 1. Flow chart of identification of planned and unplanned visits

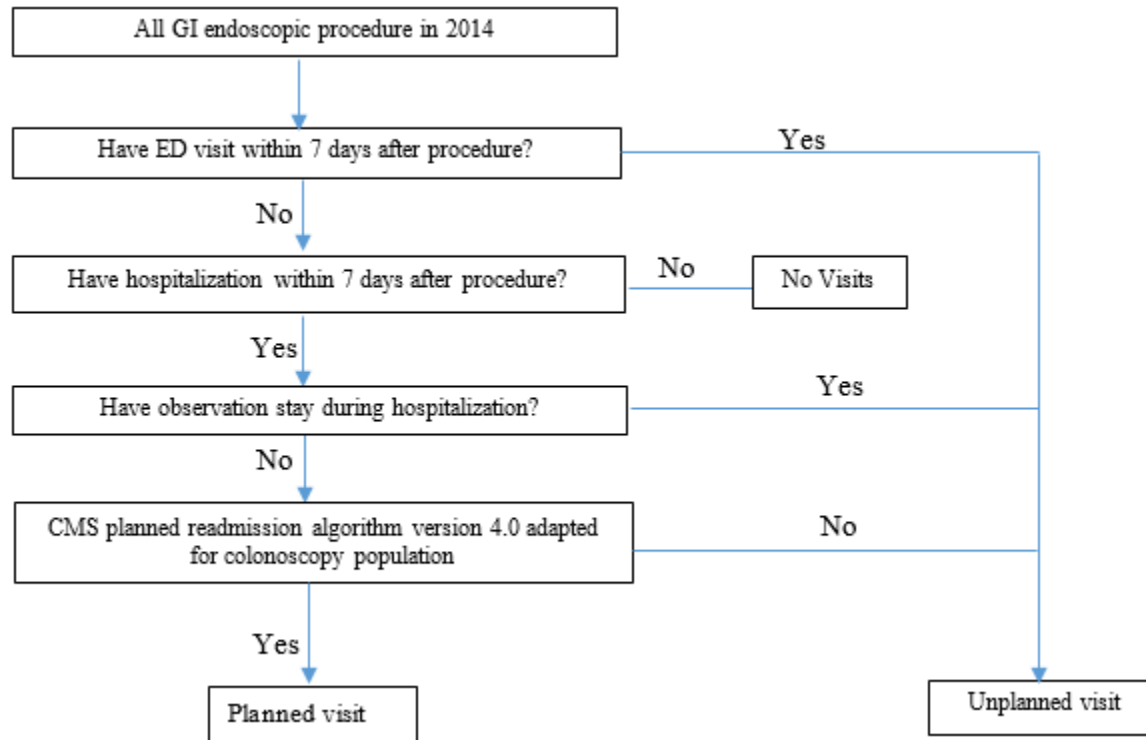

CMS planned readmission algorithm (pages 18 and 51): <https://www.cms.gov/Medicare/Quality-Initiatives-Patient-assessment-Instruments/HospitalQualityInits/Measure-Methodology.html>

**Appendix Table 1. CPT/HCPCS codes for colonoscopy**

| <b>Category</b>       | <b>CPT/HCPCS</b>                                                   | <b>Description</b>                                                                                                                                                                                                                                                    |
|-----------------------|--------------------------------------------------------------------|-----------------------------------------------------------------------------------------------------------------------------------------------------------------------------------------------------------------------------------------------------------------------|
| Screening colonoscopy | G0105                                                              | Colorectal cancer screening; colonoscopy on individual at high risk                                                                                                                                                                                                   |
|                       | G0121                                                              | Colorectal cancer screening; colonoscopy on individual not meeting criteria for high risk                                                                                                                                                                             |
|                       | 45378*                                                             | Colonoscopy, flexible, proximal to splenic flexure; diagnostic, with or without collection of specimen(s) by brushing or washing, with or without colon decompression (separate procedure)                                                                            |
|                       | Any CPT code of colonoscopy accompanied by the HCPCS modifier "PT" | Colorectal cancer screening test, converted to diagnostic test or other procedure                                                                                                                                                                                     |
|                       | Any CPT code of colonoscopy accompanied by the CPT modifier "33"   | The primary purpose of the service is the delivery of an evidence-based service in accordance with a U.S. Preventive Services Task Force A or B rating in effect and other preventive services identified in preventive services mandates (legislative or regulatory) |
| Non-invasive          | G0105                                                              | Colorectal cancer screening; colonoscopy on individual at high risk                                                                                                                                                                                                   |
|                       | G0121                                                              | Colorectal cancer screening; colonoscopy on individual not meeting criteria for high risk                                                                                                                                                                             |
|                       | 45378                                                              | Colonoscopy, flexible, proximal to splenic flexure; diagnostic, with or without collection of specimen(s) by brushing or washing, with or without colon decompression (separate procedure)                                                                            |
|                       | 45391                                                              | Colonoscopy, flexible, proximal to splenic flexure; with endoscopic ultrasound examination                                                                                                                                                                            |
|                       |                                                                    |                                                                                                                                                                                                                                                                       |
| Invasive              | 45379                                                              | Colonoscopy, flexible, proximal to splenic flexure; with removal of foreign body                                                                                                                                                                                      |
|                       | 45380                                                              | Colonoscopy, flexible, proximal to splenic flexure; with biopsy, single or multiple                                                                                                                                                                                   |
|                       | 45381                                                              | Colonoscopy, flexible, proximal to splenic flexure; with directed submucosal injection(s), any substance                                                                                                                                                              |
|                       | 45382                                                              | Colonoscopy, flexible, proximal to splenic flexure; with control of bleeding (eg, injection, bipolar cautery, unipolar cautery, laser, heater probe, stapler, plasma coagulator)                                                                                      |
|                       | 45383                                                              | Colonoscopy, flexible, proximal to splenic flexure; with ablation of tumor(s), polyp(s), or other lesion(s) not amenable to removal by hot biopsy forceps, bipolar cautery or snare technique                                                                         |

| Category | CPT/HCPCS | Description                                                                                                                                          |
|----------|-----------|------------------------------------------------------------------------------------------------------------------------------------------------------|
|          | 45384     | Colonoscopy, flexible, proximal to splenic flexure; with removal of tumor(s), polyp(s), or other lesion(s) by hot biopsy forceps or bipolar cautery  |
|          | 45385     | Colonoscopy, flexible, proximal to splenic flexure; with removal of tumor(s), polyp(s), or other lesion(s) by snare technique                        |
|          | 45386     | Colonoscopy, flexible, proximal to splenic flexure; with dilation by balloon, 1 or more strictures                                                   |
|          | 45387     | Colonoscopy, flexible, proximal to splenic flexure; with transendoscopic stent placement (includes predilation)                                      |
|          | 45392     | Colonoscopy, flexible, proximal to splenic flexure; with transendoscopic ultrasound guided intramural or transmural fine needle aspiration/biopsy(s) |

\*For California, Florida, and Georgia where CPT modifiers were not reported, the CPT code 45378 alone was considered a screening colonoscopy. For New York, Nebraska, and Vermont where CPT modifiers were reported, the CPT code 45378 was considered a screening colonoscopy only when accompanied by a “33” or “PT” modifier.

**Appendix Table 2. CPT/HCPCS codes for upper gastrointestinal endoscopy**

| Invasiveness | CPT/HCPCS                                                                          | Description                                                                                                                                                  |
|--------------|------------------------------------------------------------------------------------|--------------------------------------------------------------------------------------------------------------------------------------------------------------|
| Non-invasive | 43191                                                                              | Esophagoscopy, rigid, transoral; diagnostic, including collection of specimen(s) by brushing or washing when performed (separate procedure)                  |
|              | 43197                                                                              | Esophagoscopy, flexible, transnasal; diagnostic, includes collection of specimen(s) by brushing or washing when performed (separate procedure)               |
|              | 43200                                                                              | Esophagoscopy, flexible, transoral; diagnostic, including collection of specimen(s) by brushing or washing, when performed (separate procedure)              |
|              | 43235                                                                              | Esophagogastroduodenoscopy, flexible, transoral; diagnostic, including collection of specimen(s) by brushing or washing, when performed (separate procedure) |
|              | 43252                                                                              | Esophagogastroduodenoscopy, flexible, transoral; with optical endomicroscopy                                                                                 |
| Invasive     | 43192                                                                              | Esophagoscopy, rigid, transoral; with directed submucosal injection(s), any substance                                                                        |
|              | 43193                                                                              | Esophagoscopy, rigid, transoral; with biopsy, single or multiple                                                                                             |
|              | 43194                                                                              | Esophagoscopy, rigid, transoral; with removal of foreign body                                                                                                |
|              | 43195                                                                              | Esophagoscopy, rigid, transoral; with balloon dilation (less than 30 mm diameter)                                                                            |
|              | 43196                                                                              | Esophagoscopy, rigid, transoral; with insertion of guide wire followed by dilation over guide wire                                                           |
|              | 43198                                                                              | Esophagoscopy, flexible, transnasal; with biopsy, single or multiple                                                                                         |
|              | 43201                                                                              | Esophagoscopy, flexible, transoral; with directed submucosal injection(s), any substance                                                                     |
|              | 43202                                                                              | Esophagoscopy, flexible, transoral; with biopsy, single or multiple                                                                                          |
| 43204        | Esophagoscopy, flexible, transoral; with injection sclerosis of esophageal varices |                                                                                                                                                              |

| <b>Invasiveness</b> | <b>CPT/HCPCS</b> | <b>Description</b>                                                                                                                                                                                                  |
|---------------------|------------------|---------------------------------------------------------------------------------------------------------------------------------------------------------------------------------------------------------------------|
|                     | 43205            | Esophagoscopy, flexible, transoral; with band ligation of esophageal varices                                                                                                                                        |
|                     | 43211            | Esophagoscopy, flexible, transoral; with endoscopic mucosal resection                                                                                                                                               |
|                     | 43212            | Esophagoscopy, flexible, transoral; with placement of endoscopic stent (includes pre- and post-dilation and guide wire passage, when performed)                                                                     |
|                     | 43213            | Esophagoscopy, flexible, transoral; with dilation of esophagus, by balloon or dilator, retrograde (includes fluoroscopic guidance, when performed)                                                                  |
|                     | 43214            | Esophagoscopy, flexible, transoral; with dilation of esophagus with balloon (30 mm diameter or larger) (includes fluoroscopic guidance, when performed)                                                             |
|                     | 43215            | Esophagoscopy, flexible, transoral; with removal of foreign body                                                                                                                                                    |
|                     | 43216            | Esophagoscopy, flexible, transoral; with removal of tumor(s), polyp(s), or other lesion(s) by hot biopsy forceps or bipolar cautery                                                                                 |
|                     | 43217            | Esophagoscopy, flexible, transoral; with removal of tumor(s), polyp(s), or other lesion(s) by snare technique                                                                                                       |
|                     | 43220            | Esophagoscopy, flexible, transoral; with transendoscopic balloon dilation (less than 30 mm diameter)                                                                                                                |
|                     | 43226            | Esophagoscopy, flexible, transoral; with insertion of guide wire followed by passage of dilator(s) over guide wire                                                                                                  |
|                     | 43227            | Esophagoscopy, flexible, transoral; with control of bleeding, any method                                                                                                                                            |
|                     | 43229            | Esophagoscopy, flexible, transoral; with ablation of tumor(s), polyp(s), or other lesion(s) (includes pre- and post-dilation and guide wire passage, when performed)                                                |
|                     | 43233            | Esophagogastroduodenoscopy, flexible, transoral; with dilation of esophagus with balloon (30 mm diameter or larger) (includes fluoroscopic guidance, when performed)                                                |
|                     | 43236            | Esophagogastroduodenoscopy, flexible, transoral; with directed submucosal injection(s), any substance                                                                                                               |
|                     | 43239            | Esophagogastroduodenoscopy, flexible, transoral; with biopsy, single or multiple                                                                                                                                    |
|                     | 43240            | Esophagogastroduodenoscopy, flexible, transoral; with transmural drainage of pseudocyst (includes placement of transmural drainage catheter[s]/stent[s], when performed, and endoscopic ultrasound, when performed) |
|                     | 43241            | Esophagogastroduodenoscopy, flexible, transoral; with insertion of intraluminal tube or catheter                                                                                                                    |
|                     | 43243            | Esophagogastroduodenoscopy, flexible, transoral; with injection sclerosis of esophageal/gastric varices                                                                                                             |
|                     | 43244            | Esophagogastroduodenoscopy, flexible, transoral; with band ligation of esophageal/gastric varices                                                                                                                   |
|                     | 43245            | Esophagogastroduodenoscopy, flexible, transoral; with dilation of gastric/duodenal stricture(s) (eg, balloon, bougie)                                                                                               |
|                     | 43246            | Esophagogastroduodenoscopy, flexible, transoral; with directed placement of                                                                                                                                         |

| Invasiveness | CPT/HCPCS | Description                                                                                                                                                                                          |
|--------------|-----------|------------------------------------------------------------------------------------------------------------------------------------------------------------------------------------------------------|
|              |           | percutaneous gastrostomy tube                                                                                                                                                                        |
|              | 43247     | Esophagogastroduodenoscopy, flexible, transoral; with removal of foreign body                                                                                                                        |
|              | 43248     | Esophagogastroduodenoscopy, flexible, transoral; with insertion of guide wire followed by passage of dilator(s) through esophagus over guide wire                                                    |
|              | 43249     | Esophagogastroduodenoscopy, flexible, transoral; with transendoscopic balloon dilation of esophagus (less than 30 mm diameter)                                                                       |
|              | 43250     | Esophagogastroduodenoscopy, flexible, transoral; with removal of tumor(s), polyp(s), or other lesion(s) by hot biopsy forceps or bipolar cautery                                                     |
|              | 43251     | Esophagogastroduodenoscopy, flexible, transoral; with removal of tumor(s), polyp(s), or other lesion(s) by snare technique                                                                           |
|              | 43254     | Esophagogastroduodenoscopy, flexible, transoral; with endoscopic mucosal resection                                                                                                                   |
|              | 43255     | Esophagogastroduodenoscopy, flexible, transoral; with control of bleeding, any method                                                                                                                |
|              | 43257     | Esophagogastroduodenoscopy, flexible, transoral; with delivery of thermal energy to the muscle of lower esophageal sphincter and/or gastric cardia, for treatment of gastroesophageal reflux disease |
|              | 43266     | Esophagogastroduodenoscopy, flexible, transoral; with placement of endoscopic stent (includes pre- and post-dilation and guide wire passage, when performed)                                         |
|              | 43270     | Esophagogastroduodenoscopy, flexible, transoral; with ablation of tumor(s), polyp(s), or other lesion(s) (includes pre- and post-dilation and guide wire passage, when performed)                    |

**Appendix Table 3. CPT/HCPCS codes for comparative procedures**

| <b>CPT/HCPCS</b>     | <b>Description</b>                                                                                                                                                                                                     |
|----------------------|------------------------------------------------------------------------------------------------------------------------------------------------------------------------------------------------------------------------|
| G0202                | Screening mammography, producing direct digital image, bilateral, all views                                                                                                                                            |
| 77057                | Screening mammography, bilateral (2-view film study of each breast)                                                                                                                                                    |
| <u>G0102</u>         | Prostate cancer screening, <u>digital rectal examination</u>                                                                                                                                                           |
| <u>G0103</u>         | Prostate cancer screening, <u>prostate specific antigen test</u>                                                                                                                                                       |
| 52000                | Cystoscopy, <u>Cystourethroscopy (separate procedure)</u>                                                                                                                                                              |
| 52001                | Cystoscopy, <u>Cystourethroscopy with irrigation and evacuation of multiple obstructing clots</u>                                                                                                                      |
| 52005                | Cystoscopy, <u>Cystourethroscopy, with ureteral catheterization, with or without irrigation, instillation, or ureteropyelography, exclusive of radiologic service</u>                                                  |
| 52007                | Cystoscopy, <u>Cystourethroscopy, with ureteral catheterization, with or without irrigation, instillation, or ureteropyelography, exclusive of radiologic service; with brush biopsy of ureter and/or renal pelvis</u> |
| 52010                | Cystoscopy, <u>Cystourethroscopy, with ejaculatory duct catheterization, with or without irrigation, instillation, or duct radiography, exclusive of radiologic service</u>                                            |
| 31622                | <u>Bronchoscopy, rigid or flexible, including fluoroscopic guidance, when performed; diagnostic, with cell washing, when performed (separate procedure)</u>                                                            |
| <u>31623 – 31651</u> | <u>Bronchoscopy, rigid or flexible, including fluoroscopic guidance, when performed; with other diagnostic or therapeutic procedures</u>                                                                               |

**Appendix Table 4. ICD-9-CM codes for infections**

| <b>ICD-9-CM code</b>                                                                                      | <b>Description</b>                                                                |
|-----------------------------------------------------------------------------------------------------------|-----------------------------------------------------------------------------------|
| 001 – 136                                                                                                 | Infectious and parasitic diseases, excluding 136.1                                |
| <i>Inflammatory diseases of the central nervous system</i>                                                |                                                                                   |
| 320                                                                                                       | Bacterial meningitis                                                              |
| 321                                                                                                       | Meningitis due to other organisms (fungi, virus, trypanosomiasis)                 |
| 323.0-323.4                                                                                               | Encephalitis, myelitis, and encephalomyelitis                                     |
| 323.61                                                                                                    | Infectious acute disseminated encephalomyelitis (ADEM)                            |
| <i>Diseases of the circulatory system</i>                                                                 |                                                                                   |
| 421.0                                                                                                     | Acute and subacute bacterial endocarditis                                         |
| 421.1                                                                                                     | Acute and subacute infective endocarditis in diseases classified elsewhere        |
| <i>Diseases of respiratory system</i>                                                                     |                                                                                   |
| 460-466                                                                                                   | Acute respiratory infections                                                      |
| 480-488                                                                                                   | Pneumonia and influenza                                                           |
| 511.1                                                                                                     | Pleurisy with effusion, with mention of a bacterial cause other than tuberculosis |
| <i>Diseases of digestive system</i>                                                                       |                                                                                   |
| 566                                                                                                       | Abscess of anal and rectal regions                                                |
| 567                                                                                                       | Peritonitis and retroperitoneal infections                                        |
| <i>Diseases of genitourinary system</i>                                                                   |                                                                                   |
| 590                                                                                                       | Infections of kidney                                                              |
| <i>Supplementary classification of factors influencing health status and contact with health services</i> |                                                                                   |
| V09                                                                                                       | Infection with drug-resistant microorganisms                                      |

**Appendix Table 5. ICD-9-CM codes for aspiration pneumonia**

| <b>ICD-9-CM code</b> | <b>Description</b>                               |
|----------------------|--------------------------------------------------|
| 507.0                | Pneumonitis due to inhalation of food or vomitus |
| 507.8                | Pneumonitis due to other solids and liquids      |
| 482.89               | Pneumonia due to other specified bacteria        |
| 482.9                | Bacterial pneumonia, unspecified                 |
| 483.8                | Pneumonia due to other specified organism        |



**Appendix Table 6. Characteristics of ambulatory surgery centers of California, Florida, New York, Georgia, Nebraska, and Vermont**

|                                                        | California       |              | Florida          |              | New York         |              | Georgia          |              | Nebraska         |              | Vermont          |              |       |
|--------------------------------------------------------|------------------|--------------|------------------|--------------|------------------|--------------|------------------|--------------|------------------|--------------|------------------|--------------|-------|
| State Population <sup>a</sup> as of July 1, 2014       | 38,802,500       |              | 19,893,297       |              | 19,746,227       |              | 10,097,343       |              | 1,881,503        |              | 626,562          |              |       |
| Number of ASCs by specialty                            |                  |              |                  |              |                  |              |                  |              |                  |              |                  |              |       |
|                                                        | Non-freestanding | Freestanding | Non-freestanding | Freestanding | Non-freestanding | Freestanding | Non-freestanding | Freestanding | Non-freestanding | Freestanding | Non-freestanding | Freestanding |       |
| Number of All ASCs                                     | 353              | 35           | 221              | 392          | 252              | 120          | 134              | 88           | 14               |              |                  |              |       |
| N Perform GI endoscopy                                 | 334              | 13           | 211              | 211          | 213              | 65           | 104              | 87           | 10               |              |                  |              |       |
| N Perform Colonoscopy                                  | 330              | 11           | 209              | 190          | 208              | 63           | 95               | 86           | 10               |              |                  |              |       |
| % Multispecialty <sup>b</sup>                          | 87.0%            | 63.6%        | 94.7%            | 44.2%        | 89.4%            | 19.1%        | 74.7%            | 70.9%        | 100.0%           |              |                  |              |       |
| N Perform EGD                                          | 326              | 11           | 211              | 202          | 207              | 62           | 98               | 85           | 10               |              |                  |              |       |
| % Multispecialty                                       | 88.0%            | 63.6%        | 93.8%            | 45.3%        | 88.5%            | 16.1%        | 73.5%            | 70.6%        | 100.0%           |              |                  |              |       |
| Volume Profile by Endoscopy Type                       |                  |              |                  |              |                  |              |                  |              |                  |              |                  |              |       |
| Screening colonoscopy volume                           | Median           | 149          | 262              | 443          | 1,517            | 202          | 740              | 155          | 29               | 354          |                  |              |       |
|                                                        | Min-Max          | 1 – 3,045    | 1 – 1,518        | 1 – 1,324    | 1 – 4,252        | 1 – 3,214    | 1 – 10,525       | 2 – 1,258    | 1 – 885          | 41 – 1,468   |                  |              |       |
|                                                        | Total            | 88,156       | 5,610            | 46,333       | 140,110          | 77,812       | 67,918           | 23,740       | 7,327            | 5,062        |                  |              |       |
| Non-screening colonoscopy volume                       | Median           | 202          | 302              | 280          | 1,031            | 677          | 1,599            | 222          | 108              | 654          |                  |              |       |
|                                                        | Min-Max          | 1 – 4,173    | 3 – 2,978        | 1 – 4,053    | 1 – 7,597        | 1 – 4,254    | 6 – 7,045        | 1 – 2,129    | 2 – 2,355        | 215 – 7,115  |                  |              |       |
|                                                        | Total            | 153,637      | 10,717           | 99,987       | 263,398          | 190,070      | 129,420          | 34,148       | 18,831           | 13,932       |                  |              |       |
| EGD volume                                             | Median           | 235          | 275              | 412          | 851              | 547          | 1,362            | 226          | 50               | 377          |                  |              |       |
|                                                        | Min-Max          | 1 – 3,588    | 5 – 1,130        | 1 – 4,631    | 1 – 5,944        | 1 – 4,437    | 3 – 5,725        | 1 – 2,696    | 1 – 2,763        | 70 – 2,956   |                  |              |       |
|                                                        | Total            | 146,783      | 4,919            | 129,311      | 240,542          | 169,285      | 117,330          | 41,417       | 17,492           | 6,059        |                  |              |       |
| Patient characteristics                                |                  |              |                  |              |                  |              |                  |              |                  |              |                  |              |       |
| N, % of patients within a state                        |                  | N            | %                | N            | %                | N            | %                | N            | %                | N            | %                | N            | %     |
| Total Number of patients that had a colonoscopy or EGD |                  | 361,161      |                  | 780,347      |                  | 682,459      |                  | 92,386       |                  | 38,983       |                  | 24,554       |       |
| Age                                                    | 0-9              | 1,422        | 0.4%             | 3,076        | 0.4%             | 3,980        | 0.6%             | 558          | 0.6%             | 844          | 2.2%             | 121          | 0.5%  |
|                                                        | 10-19            | 3,780        | 1.1%             | 7,670        | 1.0%             | 9,623        | 1.4%             | 1,183        | 1.3%             | 1,328        | 3.4%             | 278          | 1.1%  |
|                                                        | 20-29            | 9,817        | 2.7%             | 18,458       | 2.4%             | 27,061       | 4.0%             | 2,627        | 2.8%             | 1,290        | 3.3%             | 583          | 2.4%  |
|                                                        | 30-39            | 17,712       | 4.9%             | 33,374       | 4.3%             | 40,768       | 6.0%             | 5,184        | 5.6%             | 2,096        | 5.4%             | 866          | 3.5%  |
|                                                        | 40-49            | 33,787       | 9.4%             | 68,803       | 8.8%             | 77,243       | 11.3%            | 10,280       | 11.1%            | 3,378        | 8.7%             | 1,995        | 8.1%  |
|                                                        | 50-59            | 114,096      | 31.6%            | 211,096      | 27.1%            | 213,439      | 31.3%            | 26,161       | 28.3%            | 11,151       | 28.6%            | 8,403        | 34.2% |
|                                                        | 60-69            | 101,745      | 28.2%            | 224,638      | 28.8%            | 181,531      | 26.6%            | 25,441       | 27.5%            | 9,884        | 25.4%            | 7,735        | 31.5% |
|                                                        | 70-79            | 57,448       | 15.9%            | 160,712      | 20.6%            | 99,713       | 14.6%            | 15,858       | 17.2%            | 6,395        | 16.4%            | 3,744        | 15.3% |
|                                                        | 80 or above      | 21,354       | 5.9%             | 52,520       | 6.7%             | 29,101       | 4.3%             | 5,094        | 5.5%             | 2,617        | 6.7%             | 829          | 3.4%  |

|                                                                   |                           | California |       | Florida |       | New York |       | Georgia |       | Nebraska |                   | Vermont |       |
|-------------------------------------------------------------------|---------------------------|------------|-------|---------|-------|----------|-------|---------|-------|----------|-------------------|---------|-------|
| Sex                                                               | Male                      | 162,226    | 44.9% | 340,755 | 43.7% | 302,902  | 44.4% | 39,003  | 42.2% | 17,860   | 45.8%             | 11,552  | 47.0% |
|                                                                   | Female                    | 198,935    | 55.1% | 439,592 | 56.3% | 379,557  | 55.6% | 53,383  | 57.8% | 21,123   | 54.2%             | 13,002  | 53.0% |
| Race                                                              | White                     | 207,636    | 57.5% | 552,183 | 70.8% | 441,668  | 64.7% | 64,899  | 70.2% | 38,893   | 100% <sup>c</sup> | 24,133  | 98.3% |
|                                                                   | Black                     | 17,753     | 4.9%  | 70,314  | 9.0%  | 71,311   | 10.5% | 22,847  | 24.8% |          |                   | 106     | 0.4%  |
|                                                                   | Hispanic                  | 78,402     | 21.7% | 136,136 | 17.5% | 72,518   | 10.6% | 2,102   | 2.3%  |          |                   | 26      | 0.1%  |
|                                                                   | Asian or Pacific Islander | 41,758     | 11.6% | 8,852   | 1.1%  | 25,348   | 3.7%  | 1,232   | 1.3%  |          |                   | 174     | 0.7%  |
|                                                                   | Native American           | 2,747      | 0.8%  | 942     | 0.1%  | 2,023    | 0.3%  | 155     | 0.2%  |          |                   | 37      | 0.2%  |
|                                                                   | Other                     | 12,865     | 3.6%  | 11,920  | 1.5%  | 69,591   | 10.2% | 1,151   | 1.3%  |          |                   | 78      | 0.3%  |
|                                                                   |                           |            |       |         |       |          |       |         |       |          |                   |         |       |
| Hospitalization within 30 days prior                              | Yes                       | 5,404      | 1.5%  | 11,009  | 1.4%  | 7,062    | 1.0%  | 1,894   | 2.0%  | 832      | 2.1%              | 221     | 0.9%  |
|                                                                   | No                        | 355,757    | 98.5% | 769,338 | 98.6% | 675,397  | 99.0% | 90,492  | 98.0% | 38,151   | 97.9%             | 24,333  | 99.1% |
| Gastrointestinal endoscopic procedure in ASC within 30 days prior | Yes                       | 6,692      | 1.9%  | 21,973  | 2.8%  | 23,772   | 3.5%  | 2,591   | 2.8%  | 846      | 2.2%              | 388     | 1.6%  |
|                                                                   | No                        | 354,469    | 98.2% | 758,374 | 97.2% | 658,687  | 96.5% | 89,795  | 97.2% | 38,137   | 97.8%             | 24,166  | 98.4% |
| Elixhauser score                                                  | 0                         | 210,337    | 58.2% | 608,606 | 78.0% | 497,957  | 73.0% | 35,782  | 38.7% | 24,088   | 61.8%             | 17,214  | 70.1% |
|                                                                   | 1                         | 77,596     | 21.5% | 103,327 | 13.2% | 106,058  | 15.5% | 25,004  | 27.1% | 8,393    | 21.5%             | 4,731   | 19.3% |
|                                                                   | 2 or above                | 73,228     | 20.3% | 68,414  | 8.8%  | 78,444   | 11.5% | 31,600  | 34.2% | 6,502    | 16.7%             | 2,609   | 10.6% |

ASC: Ambulatory surgery center; GI: Gastrointestinal; EGD: Esophagogastroduodenoscopy

<sup>a</sup> Population statistics were queried from United States Census Bureau:

[https://factfinder.census.gov/faces/tableservices/jsf/pages/productview.xhtml?pid=PEP\\_2016\\_PEPANNRES&src=pt](https://factfinder.census.gov/faces/tableservices/jsf/pages/productview.xhtml?pid=PEP_2016_PEPANNRES&src=pt)

<sup>b</sup> Multispecialty ASC is defined as an ASC where both GI and non-GI endoscopies (bronchoscopy or cystoscopy) are performed.

<sup>c</sup> Imputed based on majority in the statewide ZIP codes because variable was not available in the state datasets.

**Appendix Table 7. Rates of 7-day unplanned visit related to aspiration pneumonia after colonoscopy, esophagogastroduodenoscopy (EGD) or screening mammography at an ambulatory surgery center, 2014**

| Aspiration pneumonia (ICD-9-CM codes)                            | Screening colonoscopy<br>(N=462,068) |                          | Non-screening<br>colonoscopy (N=914,140) |                          | EGD<br>(N=873,138) |                          | Screening mammography<br>(N=647,212) |                          |
|------------------------------------------------------------------|--------------------------------------|--------------------------|------------------------------------------|--------------------------|--------------------|--------------------------|--------------------------------------|--------------------------|
|                                                                  | N of<br>visits                       | Rate/1,000<br>procedures | N of<br>visits                           | Rate/1,000<br>procedures | N of<br>visits     | Rate/1,000<br>procedures | N of<br>visits                       | Rate/1,000<br>procedures |
| <b>Aspiration pneumonia (507.0, 507.8, 482.89, 482.9, 483.8)</b> | <b>40</b>                            | <b>0.087</b>             | <b>89</b>                                | <b>0.097</b>             | <b>291</b>         | <b>0.333</b>             | <b>10</b>                            | <b>0.015</b>             |
| Pneumonitis due to inhalation of food or vomitus (507.0)*        | 34                                   | 0.074                    | 82                                       | 0.090                    | 273                | 0.313                    | 6                                    | 0.009                    |
| Pneumonitis due to other solids and liquids (507.8)              | 1                                    | 0.002                    | 0                                        | 0                        | 1                  | 0.001                    | 0                                    | 0                        |
| Pneumonia due to other specified bacteria (482.89)               | 0                                    | 0                        | 0                                        | 0                        | 1                  | 0.001                    | 0                                    | 0                        |
| Bacterial pneumonia, unspecified (482.9)                         | 5                                    | 0.011                    | 7                                        | 0.008                    | 15                 | 0.017                    | 3                                    | 0.005                    |
| Pneumonia due to other specified organism (483.8)                | 0                                    | 0                        | 0                                        | 0                        | 2                  | 0.002                    | 1                                    | 0.002                    |

**Appendix Table 8. 7-day infection-related unplanned visit rates (by infection site and anesthesia method) after colonoscopy or esophagogastroduodenoscopy (EGD) at an ambulatory surgery center in the state of New York\*, 2014**

| Infection (ICD-9-CM codes)                                                         | Screening colonoscopy (N=145,693) |                       |                                   |                       | Non-screening colonoscopy (N=319,078) |                       |                                   |                       | EGD (N=286,296)               |                       |                                   |                       | Screening mammography (N=72,588) |                       |
|------------------------------------------------------------------------------------|-----------------------------------|-----------------------|-----------------------------------|-----------------------|---------------------------------------|-----------------------|-----------------------------------|-----------------------|-------------------------------|-----------------------|-----------------------------------|-----------------------|----------------------------------|-----------------------|
|                                                                                    | General Anesthesia (N=13,270)     |                       | No general anesthesia (N=132,423) |                       | General Anesthesia (N=41,976)         |                       | No general anesthesia (N=277,102) |                       | General Anesthesia (N=41,040) |                       | No general anesthesia (N=245,256) |                       | No general anesthesia (N=72,588) |                       |
|                                                                                    | N of visits                       | Rate/1,000 procedures | N of visits                       | Rate/1,000 procedures | N of visits                           | Rate/1,000 procedures | N of visits                       | Rate/1,000 procedures | N of visits                   | Rate/1,000 procedures | N of visits                       | Rate/1,000 procedures | N of visits                      | Rate/1,000 procedures |
| <b>7-day infection-related unplanned visits</b>                                    | <b>7</b>                          | <b>0.528</b>          | <b>93</b>                         | <b>0.702</b>          | <b>42</b>                             | <b>1.001</b>          | <b>348</b>                        | <b>1.256</b>          | <b>108</b>                    | <b>2.652</b>          | <b>506</b>                        | <b>2.070</b>          | <b>74</b>                        | <b>1.019</b>          |
| <b>Infections of gastrointestinal system (001-009, 566-567)</b>                    | <b>0</b>                          | <b>0</b>              | <b>8</b>                          | <b>0.060</b>          | <b>14</b>                             | <b>0.334</b>          | <b>57</b>                         | <b>0.206</b>          | <b>22</b>                     | <b>0.535</b>          | <b>65</b>                         | <b>0.265</b>          | <b>9</b>                         | <b>0.124</b>          |
| Intestinal infectious diseases (001-009)                                           | 0                                 | 0                     | 4                                 | 0.030                 | 9                                     | 0.214                 | 31                                | 0.112                 | 16                            | 0.389                 | 41                                | 0.167                 | 5                                | 0.069                 |
| Abscess of anal and rectal regions (566)                                           | 0                                 | 0                     | 2                                 | 0.015                 | 1                                     | 0.024                 | 3                                 | 0.011                 | 0                             | 0                     | 2                                 | 0.008                 | 3                                | 0.041                 |
| Peritonitis and retroperitoneal infections (567)                                   | 0                                 | 0                     | 3                                 | 0.023                 | 4                                     | 0.095                 | 23                                | 0.083                 | 6                             | 0.146                 | 22                                | 0.090                 | 1                                | 0.014                 |
| <b>Infections of respiratory system (460-466, 480-488, 511.1)</b>                  | <b>5</b>                          | <b>0.377</b>          | <b>46</b>                         | <b>0.347</b>          | <b>17</b>                             | <b>0.405</b>          | <b>143</b>                        | <b>0.516</b>          | <b>44</b>                     | <b>1.071</b>          | <b>192</b>                        | <b>0.790</b>          | <b>39</b>                        | <b>0.537</b>          |
| Pneumonia (480-486)                                                                | 3                                 | 0.226                 | 22                                | 0.166                 | 9                                     | 0.214                 | 56                                | 0.202                 | 20                            | 0.487                 | 107                               | 0.444                 | 12                               | 0.165                 |
| Influenza (487-488)                                                                | 0                                 | 0                     | 5                                 | 0.038                 | 0                                     | 0                     | 7                                 | 0.025                 | 0                             | 0                     | 8                                 | 0.033                 | 0                                | 0                     |
| Acute respiratory infections (460-466)                                             | 2                                 | 0.151                 | 19                                | 0.143                 | 8                                     | 0.191                 | 82                                | 0.296                 | 24                            | 0.584                 | 78                                | 0.318                 | 27                               | 0.372                 |
| Septicemia (038)                                                                   | 0                                 | 0                     | 12                                | 0.091                 | 11                                    | 0.262                 | 61                                | 0.220                 | 16                            | 0.414                 | 110                               | 0.452                 | 3                                | 0.041                 |
| <b>Infections of genitourinary system (590)</b>                                    | <b>0</b>                          | <b>0</b>              | <b>2</b>                          | <b>0.015</b>          | <b>2</b>                              | <b>0.048</b>          | <b>12</b>                         | <b>0.043</b>          | <b>3</b>                      | <b>0.073</b>          | <b>11</b>                         | <b>0.045</b>          | <b>1</b>                         | <b>0.014</b>          |
| <b>Infectious/bacterial endocarditis (421.0, 421.1)</b>                            | <b>0</b>                          | <b>0</b>              | <b>0</b>                          | <b>0</b>              | <b>0</b>                              | <b>0</b>              | <b>1</b>                          | <b>0.004</b>          | <b>0</b>                      | <b>0</b>              | <b>1</b>                          | <b>0.004</b>          | <b>0</b>                         | <b>0</b>              |
| <b>Infections of central nervous system (320, 321, 323.0-323.2, 323.4, 323.61)</b> | <b>0</b>                          | <b>0</b>              | <b>0</b>                          | <b>0</b>              | <b>0</b>                              | <b>0</b>              | <b>0</b>                          | <b>0</b>              | <b>0</b>                      | <b>0</b>              | <b>0</b>                          | <b>0</b>              | <b>0</b>                         | <b>0</b>              |

\*Information on anesthesia utilization was only available for New York.
